# Supplementary material for: Modification of Ni–P alloy coatings for better hydrogen production by electrochemical dissolution and TiO2nanoparticles
Source: Royal Society of Chemistry journal article supplement (doi:10.1039/c6ra09497j), 2016-01-01
Supplement: c6ra09497j1.pdf [file c6ra09497j1.pdf]

## Modification of Ni-P alloy coatings for better hydrogen production by electrochemical dissolution and TiO<sub>2</sub> nanoparticles

Liju Elias and A. Chitharanjan Hegde\*

Electrochemistry Research Lab, Department of Chemistry

National Institute of Technology Karnataka, Surathkal

Srinivasnagar- 575 025, India

[\\*acrhegde@gmail.com](mailto:acrhegde@gmail.com)

### Supplementary Information:

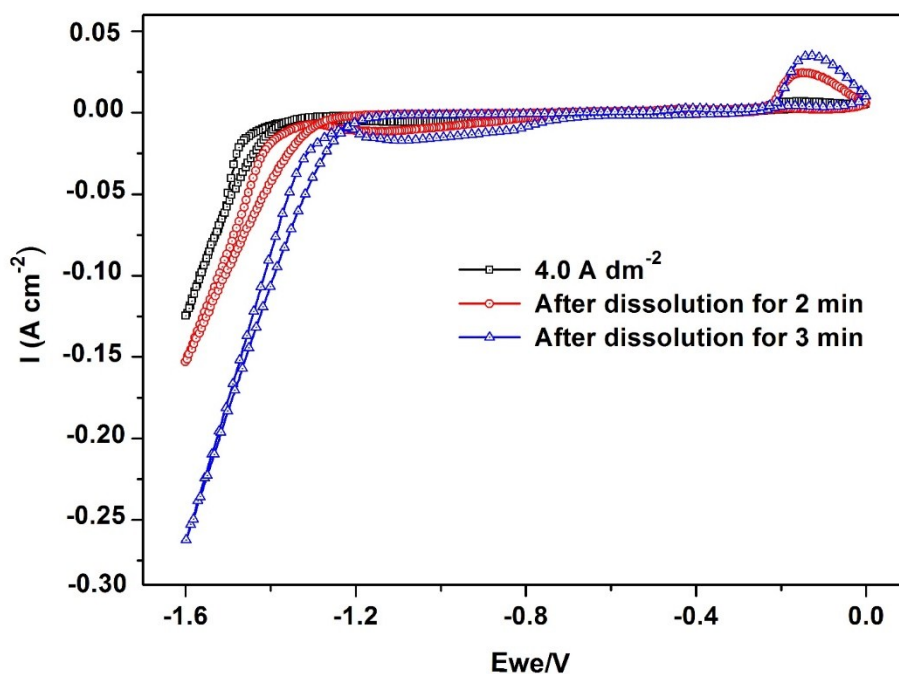

Fig. S1 Variation in CV pattern with increase in dissolution time

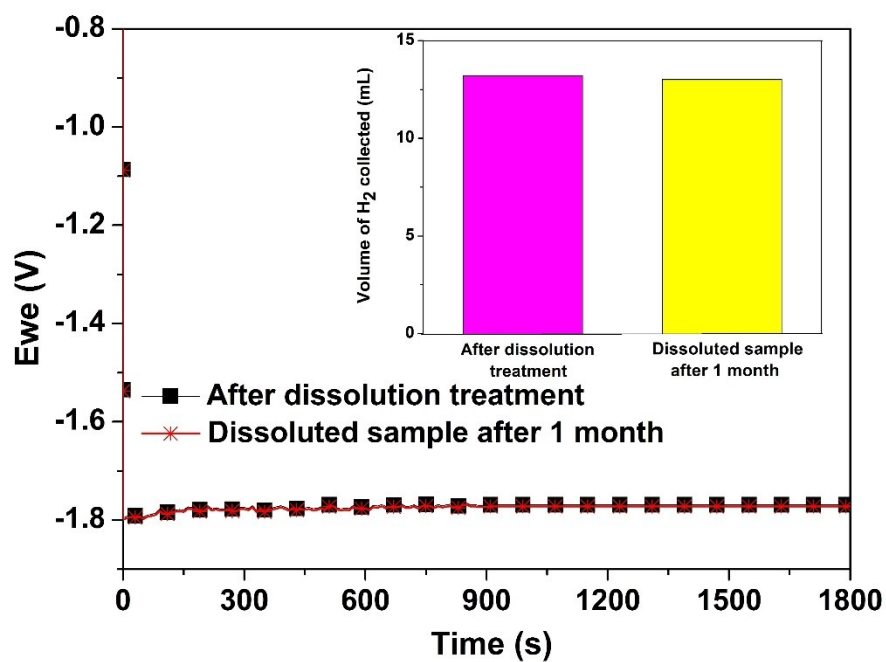

Fig. S2 Chronopotentiograms for anodically treated samples, just after dissolution treatment and 1 month after dissolution

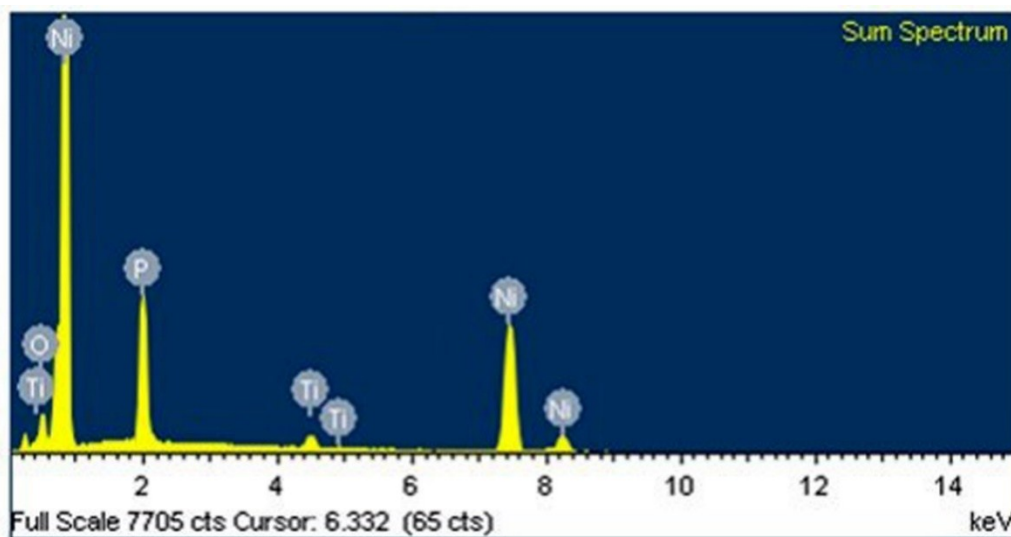

Fig. S3 The EDS data confirming the incorporation of TiO<sub>2</sub> in the deposit
